# Supplementary material for: DTL-IceNet: A Dual-Task Learning Architecture with Multi-Scale Fusion Mechanisms for Enhanced Ice Detection on Transmission Lines
Source: Copernicus journal article supplement (doi:10.5194/egusphere-2025-3097), 2025-11-13
Supplement: Supplementary file [file egusphere-2025-3097-AC2-supplement.pdf]

Thank you very much for taking the time to review this manuscript. I have responded to each of the issues raised by the two reviewers and have revised the manuscript.

## Response to Reviewer 2 Comments

Comments 1- Please provide detailed information for different branch in ResSepNet in Section 3.3.1. Has results in Figure 9 been statistically tested? Please include more information on this.

**Response:** We sincerely thank the reviewer for the valuable comments regarding the structural details and experimental rigor of ResSepNet. In response to your concerns, we have added a detailed description of the design principles and functional roles of each branch in Section 3.3.1, “ResSepNet Branch Ablation Experiment” in the revised manuscript. Specifically, the background branch is designed to extract environmental features and suppress background noise, the icing branch focuses on capturing detailed and textural features of the icing regions on transmission lines, and the global branch employs EfficientNet-B3 to extract global contextual information from the entire image. These multi-scale features are then normalized and fused to enhance the discriminative capability for ice type recognition. In addition, to address the statistical reliability of the results shown in Figure 9, we clarified that the reported results are the average of five independent experimental runs conducted under identical training and testing datasets and hardware environments, ensuring good comparability and consistency. The small variation among repeated experiments further demonstrates the high stability of the proposed model.

Specific modifications are as follows: (Page 14; Page 15)

### 3.3.1 ResSepNet Branch Ablation Experiment

#### 370 3.3.1 ResSepNet Branch Ablation Experiment

371 In ResSepNet, the ice type recognition task is achieved through the collaborative efforts of the background branch,  
372 icing branch, and global branch. The background branch preprocesses the original image to extract the background  
373 subgraph, focusing on capturing environmental features in the image while minimizing the interference of background  
374 noise. The icing branch, on the other hand, specializes in extracting features of the icing on the transmission line. It  
375 uses a structure similar to that of the background branch but places greater emphasis on capturing the details and  
376 texture information of the icing area. The global branch directly inputs the entire image, utilizing EfficientNet-B3 as  
377 the backbone network to extract macro features from the full image and capture global context information through a  
378 transfer learning model. The design of these three branches aims to capture both local and global information at dif-  
379 ferent spatial scales by performing feature extraction in different regions, thereby effectively reducing the influence  
380 of background noise and improving the accuracy of ice type recognition. By normalizing and fusing the features  
381 extracted from the different branches, ResSepNet can fully leverage the spatial scale information extracted by each  
382 branch, ultimately leading to more accurate ice type recognition results.

397 **Figure 9.** Confusion matrix of ice type recognition effect of each branch of ResSepNet.

398  
399 For the results in Figure 9, five independent experimental runs were conducted and the average values were reported  
400 to ensure data stability and reliability. All runs used the same training and test datasets and were performed under  
401 identical hardware conditions to guarantee consistency. Thus, the confusion matrix in Figure 9 represents the averaged  
402 results with minimal variation, indicating high model stability across repeated experiments. Based on the confusion

Comments 2- The paper currently lacks a dedicated "Discussion" section, which limits the depth and completeness of the research. It is recommended that the authors add this section, focusing on the following three key aspects: Model Advantages, Mechanism Interpretation and Model Limitations.

**Response:** We sincerely thank the reviewer for pointing out the absence of a dedicated Discussion section in the original manuscript. Following your suggestion, we have newly added and systematically constructed Section 4 Discussion in the revised version, where the proposed method is analyzed in depth from three key aspects: model advantages, mechanism interpretation, and model limitations. Regarding model advantages, we discuss the overall strengths of DTL-IceNet in ice type recognition, ice region segmentation, and ice thickness estimation from the perspectives of multi-task collaboration and multi-source information fusion, highlighting its improvements over existing methods. With respect to mechanism interpretation, we analyze the intrinsic reasons for the strong performance of the model along three main lines, namely multi-branch feature extraction, multi-scale attention mechanisms, and the collaborative modeling of geometric and meteorological constraints. In terms of model limitations, we further discuss the fact that the current dataset does not yet cover extreme weather or complex terrain conditions, that thickness validation is only based on clear-sky observation-site data, and that the dual-view structure has not been fully validated under real side-view imaging conditions, and we objectively analyze their potential impacts on model generalization. In addition, we combine different imaging conditions and meteorological factors to investigate, at the mechanism level, the possible error sources of the model in complex environments. The Discussion section also explicitly outlines future research directions involving extreme weather scenarios, multi-terrain environments, and real dual-view experimental platforms. Overall, the newly added Discussion provides a comprehensive and critical reflection on this work from the perspectives of advantages, mechanisms, limitations, and future developments.

Specific modifications are as follows: [\(Page 23-25\)](#)

#### **4 Discussion**

#### 594 4 Discussion

595 The dual-task learning framework, DTL-IceNet, proposed in this study demonstrates high reliability in both ice type  
596 recognition and thickness detection tasks. Its main contribution lies in the unified modeling of three types of infor-  
597 mation: type, geometry, and meteorology, which effectively enhances the comprehensive sensing ability of icing con-  
598 ditions on transmission lines. This fusion-based design aligns with the view emphasized in the literature that "ice  
599 physics, image features, and environmental processes must be considered in a coordinated manner" (Fan et al., 2018;  
600 Hao et al., 2023; Chen et al., 2024; Dong et al., 2022; Meng et al., 2025; Han et al., 2024), and it achieves both  
601 discriminative ability and physical consistency in typical monitoring scenarios, leading to significant improvements  
602 over existing methods.

603 In the ice type recognition task, the model explicitly separates the background, conductor, and icing regions through  
604 a multi-branch feature extraction structure. Studies by Fan et al. (2018). and Hao et al. (2023) have pointed out that  
605 ice recognition is highly sensitive to the environmental background, and deep networks based on a single-path feature  
606 extraction often struggle to fully capture the local texture of the conductor in complex backgrounds. The decomposi-  
607 tion-based modeling approach of DTL-IceNet significantly enhances the distinction between different types of icing  
608 under complex lighting, fog, and noise conditions, providing stronger anti-interference ability compared to single-  
609 branch methods.

610 In the ice region segmentation task, MOMSA-SegNet leverages a multi-scale attention module to improve the rep-  
611 resentation capability of thin conductors and irregularly shaped icing areas. Existing research has shown that tradi-  
612 tional edge detection or low-level feature methods exhibit poor robustness in weak boundaries, low contrast, and  
613 nighttime scenarios (Han et al., 2024; Tan & Le, 2019; Hu et al., 2018; Vasu et al., 2023; Li et al., 2016). In contrast,  
614 the multi-scale attention mechanism effectively utilizes the contextual structure surrounding the transmission line,  
615 allowing the model to maintain stable geometric contour predictions in typical scenes such as sunny, foggy, and  
616 nighttime conditions. Its accuracy advantage stems from the targeted utilization of the transmission line image struc-  
617 ture rather than relying solely on the depth of the network or the scale of parameters.

618 For ice thickness estimation, the improvement in model performance is mainly attributed to the synergistic effect  
619 of geometric and meteorological constraints. The image geometric information provides the basic trend of ice volume  
620 changes, but relying solely on 2D images cannot accurately reflect the true 3D shape of the ice, leading to systematic  
621 biases during temperature, humidity, wind speed, and precipitation phases. By introducing the meteorological correc-  
622 tion term based on environmental factors, the model performs consistent corrections on the initial thickness estimation  
623 according to the basic physical laws of ice growth and melting, effectively compensating for the inherent structural  
624 biases in the geometric estimation. Experimental results show that the thickness curves align more closely with the  
625 actual distribution across multiple phases, indicating the complementary role of geometric and meteorological infor-  
626 mation in thickness estimation.

627 Although DTL-IceNet demonstrates robustness under typical monitoring conditions, its applicability is still limited  
628 by the data coverage and experimental conditions. The data used in this study were primarily collected in typical  
629 meteorological scenarios and have not yet covered extreme weather conditions such as severe convection or freezing  
630 rain coupled with strong winds. Under such conditions, the signal-to-noise ratio of images and the rate of ice mor-  
631 phology change may exceed the training distribution, and the model's robustness needs further validation. Moreover,  
632 the current experimental data do not systematically reflect complex spatial environments with significant topographic  
633 variations. Existing studies have shown that terrain, especially in valley wind fields, significantly impacts icing dis-  
634 tribution, so the model's performance in complex terrain scenarios remains uncertain.



635 While the segmentation experiments presented in this study systematically show performance differences under  
636 various imaging conditions such as sunny days, fog, and nighttime, the thickness validation experiments were limited  
637 by the actual conditions of the observation field, which only included real thickness calibration data from sunny sce-  
638 narios and could not directly quantify thickness estimation accuracy under various weather conditions. To address this  
639 logical gap, we will further analyze the potential impact of weather factors on thickness estimation. Mechanistically,  
640 weather changes affect thickness results mainly through two paths. First, imaging degradation such as fog and low  
641 light reduces the clarity of the ice and conductor boundaries, causing segmentation masks to deviate in geometric  
642 details and directly affecting the preliminary thickness calculation based on area and contour inference. Second, me-  
643 teorological variables such as temperature, humidity, and wind speed determine the growth and melting rates of the  
644 ice, strongly driving the temporal evolution of thickness. The meteorological correction module of DTL-IceNet can  
645 provide systematic corrections based on this driving pattern, but it cannot completely compensate for geometric devi-  
646 ations caused by severe imaging degradation. Therefore, under real fog or nighttime conditions, the initial thickness  
647 errors may increase, while the optimized thickness is expected to show more stable but still limited corrections.

648 The dual-perspective approach proposed in this study is one of the key innovations of the overall framework.  
649 Through joint segmentation of the main and side perspectives, the major and minor axes of the ice-covered cross-  
650 section can be theoretically estimated, improving the certainty of geometric parameters. However, it is important to  
651 note that the thickness validation experiment in this paper was limited by site constraints and did not actually deploy  
652 transmission lines for real side-perspective imaging. Thickness detection relied on a simplified geometric assumption  
653 primarily based on the main perspective. This experimental condition means that the final obtained thickness accuracy  
654 mainly reflects the performance under the simplified single-perspective system rather than the upper limit of a com-  
655 plete dual-perspective structure. Therefore, while the current results prove the feasibility and potential value of the  
656 proposed framework, they do not fully validate the information gain of the dual-perspective structure in real multi-  
657 conductor scenarios. This also suggests that the side-perspective segmentation error's impact on thickness calculation  
658 has not been fully quantified. Future work will focus on building an experimental platform that truly reflects the dual-  
659 perspective structure to systematically evaluate error propagation mechanisms and further optimize geometric fusion  
660 methods.

661 In summary, DTL-IceNet forms a cohesive solution across ice type recognition, geometric structure extraction, and  
662 thickness estimation, with its advantages derived from complementary constraints between tasks and explicit incor-  
663 poration of physical processes.

Comments 3- The connection between the high mIoU of MOMSA-SegNet and the final thickness MAPE is not sufficiently demonstrated. To validate the overall framework, it is essential to provide evidence that the superior segmentation performance is a prerequisite for the low thickness error. Ablation studies comparing the impact of different segmentation qualities on the final MAPE are needed.

**Response:** We sincerely thank the reviewer for the professional and highly targeted suggestions. In response to your comments, we have added a new Section 3.5.2, entitled “Effect of Different Segmentation Models on Ice Thickness Detection,” in the revised manuscript. Under strictly identical ice-type recognition and thickness optimization procedures, UNet++, SegNet, DySample, and the proposed MOMSA-SegNet are respectively employed as the front-end segmentation module, and comparative thickness estimation experiments are conducted on the same observation-site test dataset. The impacts of different segmentation qualities on both the initial and optimized thickness errors are systematically evaluated. The experimental results (Table 5) demonstrate that better segmentation performance consistently leads to lower MAPE and MSE for both the initial and optimized

thickness estimates, and the thickness estimation based on MOMSA-SegNet achieves the best performance across all evaluation metrics. Moreover, even after the introduction of meteorological correction, the error differences among different segmentation models remain evident, indicating that the geometric structural errors introduced at the segmentation stage cannot be fully eliminated by the back-end meteorological correction. These results directly verify, under unified experimental conditions, that high segmentation accuracy is a necessary prerequisite for achieving low thickness estimation error, and quantitatively reveal the decisive influence of segmentation quality on the final thickness estimation performance.

Specific modifications are as follows: (Page 21-22)

### 3.5.2 Effect of Different Segmentation Models on Ice Thickness Detection

#### 3.5.2 Effect of Different Segmentation Models on Ice Thickness Detection

To quantitatively evaluate the impact of the segmentation module on the accuracy of final ice thickness estimation, this study, under the premise of maintaining consistency in the ice type recognition and thickness optimization calculation processes, uses UNet++, SegNet, DySample, and MOMSA-SegNet as the frontend segmentation models. The thickness estimation experiments were conducted on the same observation field test dataset. The ice type recognition module and thickness optimization calculation module were kept unchanged, and only the ice segmentation submodule was replaced with different typical methods. The initial thickness and optimized thickness errors were then computed on the corresponding observation field thickness test data. This approach allows a direct comparison of the effects of different segmentation models on geometric scale calculation and error propagation within a unified framework, providing a clearer insight into the structural relationship between segmentation quality and thickness detection accuracy. The experimental results are shown in Table 5.

**Table 5.** Comparison of ice thickness detection performance driven by different segmentation models

| Modules                   | Initial ice thickness<br>MAPE(%) | Optimized ice thick-<br>ness MAPE(%) | Initial ice thickness<br>MSE | Optimized ice<br>thickness MSE |
|---------------------------|----------------------------------|--------------------------------------|------------------------------|--------------------------------|
| UNet++                    | 69.53                            | 14.58                                | 80.93                        | 2.26                           |
| SegNet                    | 65.38                            | 13.71                                | 76.09                        | 2.12                           |
| DySample                  | 57.45                            | 12.05                                | 66.86                        | 1.87                           |
| <b>MOMSA-SegNet(Ours)</b> | <b>56.36</b>                     | <b>11.82</b>                         | <b>65.60</b>                 | <b>1.83</b>                    |

As seen in Table 5, under the same ice type recognition and meteorological correction processes, the performance of ice thickness detection shows a consistent trend with different segmentation models as frontend submodules. The better the segmentation performance, the lower the initial and optimized thickness errors. When MOMSA-SegNet, the segmentation model proposed in this paper, is used, both the MAPE and MSE of the initial thickness are the lowest. After replacing it with UNet++, SegNet, or DySample, both errors increase to varying degrees. This indicates that the segmentation stage directly affects the accuracy of the ice contour and area depiction, which in turn influences the downstream geometric parameter estimation. Segmentation errors accumulate and amplify in the calculation of equivalent ice thickness.



540 A further comparison of the initial and optimized thickness metrics reveals that after the introduction of meteorological correction, the MAPE and MSE for all models significantly decrease, showing that the environmental-driven  
541 correction terms can effectively compensate for the system errors caused by the 2D perspective and geometric simplifications. However, the relative differences between the models still remain even after optimization. Even with meteorological correction, the thickness estimation based on MOMSA-SegNet maintains the lowest MAPE and MSE,  
542 while segmentation models with weaker performance still exhibit higher optimization errors. This suggests that the meteorological correction mainly targets global system biases related to environmental processes, and cannot fully  
543 counteract the structural errors in the ice region contour and scale caused by segmentation. Thus, it can be concluded that segmentation quality determines the geometric baseline for thickness estimation, while meteorological correction  
544 fine-tunes this baseline, forming a hierarchical complementary relationship.

550 In conclusion, under the condition of complete consistency in the thickness estimation algorithm and test dataset, simply replacing the segmentation module results in a monotonous or nearly monotonous decrease in thickness errors  
551 with the improvement of segmentation model performance. This result confirms the substantial contribution of MOMSA-SegNet in ice thickness detection from a data-driven perspective. Its higher segmentation accuracy not only  
552 reflects in pixel-level metrics but also significantly reduces the initial errors in downstream thickness estimation, maintaining its advantage even after meteorological correction and effectively transmitting the improved segmentation  
553 performance to the final physical quantity estimation results.
